# Supplementary material for: Greenland shark (Somniosus microcephalus) feeding behavior on static fishing gear, effect of SMART (Selective Magnetic and Repellent-Treated) hook deterrent technology, and factors influencing entanglement in bottom longlines
Source: PeerJ. 2018 May 17;6:e4751. doi: 10.7717/peerj.4751 (PMC5960585; doi:10.7717/peerj.4751)
Supplement: Supplemental Information 1 [file peerj-06-4751-s001.xlsx]

## Sheet: longline catch data
Number	Capture Date	Depth	Longline String	Hook type	Body Length Category	Length Code	Sex	Hooked by mouth	Hooked by Tail Alone	No hooks in mouth	Tail/Body entanglement	No. Hooks entangled	Time to release
1	2011-08-07	300	Experimental	SMART hook	<3 m	1	F	Y	N	1	N	0	<1
2	2011-08-07	300	Survey	Non-treated	3-4 m	2	F	Y	N	1	Y	13	5
3	2011-08-07	300	Experimental	SMART hook	3-4 m	2	M	N	N	0	Y	15	10
4	2011-08-08	500	Experimental	SMART hook	>4 m	3	F	Y	N	2	Y	33	15
5	2011-08-09	960	Experimental	SMART hook	>4 m	3	F	Y	N	2	Y	96	14
6	2011-08-09	960	Survey	SMART hook	>4 m	3	M	N	N	1	Y	60	7
7	2011-08-09	960	Experimental	SMART hook	>4 m	3	F	Y	N	2	Y	52	16
8	2011-08-09	960	Experimental	SMART hook	3-4 m	2	M	Y	N	1	Y	35	5
9	2011-08-10	890	Survey	Non-treated	<3 m	1	M	Y	N	1	N	0	<1
10	2011-08-10	890	Survey	Non-treated	>4 m	3	M	Y	N	2	Y	22	10
11	2011-08-10	890	Survey	Non-treated	>4 m	3	F	Y	N	2	Y	60	20
12	2011-08-13	1002	Survey	Non-treated	<3 m	1	M	Y	N	2	N	0	<1
13	2011-08-13	1002	Survey	Non-treated	3-4 m	2	F	Y	N	3	Y	21	2
14	2011-08-14	715	Survey	Non-treated	<3 m	1	M	Y	N	1	N	0	<1
15	2011-08-15	590	Survey	Non-treated	<3 m	1	F	Y	N	1	N	0	<1
16	2011-08-15	590	Survey	Non-treated	<3 m	1	F	Y	N	1	N	0	<1
17	2011-08-15	590	Survey	Non-treated	<3 m	1	F	Y	N	3	Y	5	3
18	2011-08-15	590	Survey	Non-treated	3-4 m	2	F	Y	N	1	Y	13	10
19	2011-08-18	1000	Survey	Non-treated	<3 m	1	NA	N	Y	0	N	0	<1
20	2011-08-18	1000	Survey	Non-treated	<3 m	1	NA	Y	Y	0	N	0	<1
21	2011-08-18	1000	Survey	Non-treated	<3 m	1	NA	Y	N	1	N	0	<1
22	2011-08-19	540	Survey	Non-treated	3-4 m	2	NA	Y	N	1	Y	22	10
23	2011-08-19	540	Survey	Non-treated	<3 m	1	M	Y	N	1	N	0	<1
24	2011-08-19	540	Survey	Non-treated	<3 m	1	F	Y	N	1	N	0	<1
25	2011-08-19	540	Survey	Non-treated	<3 m	1	NA	Y	N	1	N	0	<1
26	2011-08-19	540	Survey	Non-treated	<3 m	1	F	N	Y	0	N	0	<1
27	2011-08-27	1000	Survey	Non-treated	<3 m	1	F	Y	N	1	N	0	<1
