# Supplementary material for: Greenland shark (Somniosus microcephalus) feeding behavior on static fishing gear, effect of SMART (Selective Magnetic and Repellent-Treated) hook deterrent technology, and factors influencing entanglement in bottom longlines
Source: PeerJ. 2018 May 17;6:e4751. doi: 10.7717/peerj.4751 (PMC5960585; doi:10.7717/peerj.4751)
Supplement: Supplemental Information 2 [file peerj-06-4751-s002.xlsx]

## Sheet: Bioassay
Test Year	Depth	Capture Hook type	Body Length Category	Sex	Hooked by mouth only	Tail entanglement	Shark Behaviour at surface	Bioassay Test Material	Bioassay response
2011	890	non-treated	<3 m	M	Yes	No	no resistance/lethargic	SMART hook/Magnesium strip	No response/No response
2011	1002	non-treated	<3 m	M	Yes	No	no resistance/lethargic	SMART hook/Magnesium strip	No response/No response
2011	715	non-treated	<3 m	M	Yes	No	no resistance/lethargic	SMART hook/Magnesium strip	No response/No response
2011	600	non-treated	<3 m	M	Yes	No	no resistance/lethargic	SMART hook/Magnesium strip	No response/No response
2012	708	non-treated	<3 m	F	Yes	No	no resistance/lethargic	SMART hook/Magnesium strip	No response/No response
2012	708	non-treated	<3 m	F	Yes	No	no resistance/lethargic	SMART hook/Magnesium strip	No response/No response
2012	708	non-treated	3-4 m	M	Yes	No	no resistance/lethargic	SMART hook/Magnesium strip	No response/No response
2012	1000	non-treated	<3 m	F	Yes	No	no resistance/lethargic	SMART hook/Magnesium strip	No response/No response
2013	764	non-treated	3-4 m	M	Yes	No	no resistance/lethargic	SMART hook/Magnesium strip	No response/No response
2013	710	non-treated	<3 m	M	Yes	No	no resistance/lethargic	SMART hook/Magnesium strip	No response/No response
2013	710	non-treated	3-4 m	F	Yes	No	no resistance/lethargic	SMART hook/Magnesium strip	No response/No response
2013	1089	non-treated	>4 m	F	Yes	No	no resistance/lethargic	SMART hook/Magnesium strip	No response/No response
2013	1050	non-treated	>4 m	F	Yes	No	no resistance/lethargic	SMART hook/Magnesium strip	No response/No response
2013	1125	non-treated	<3 m	F	Yes	No	no resistance/lethargic	SMART hook/Magnesium strip	No response/No response
